**Short Title: *Catalase protects against non-enzymatic decarboxylations***

Corresponding Author  
Berkley Walker  
berkley@msu.edu  
Phone: (517) 355-3928

**Title: *Catalase protects against non-enzymatic decarboxylations during photorespiration***

Han Bao<sup>1</sup>  
Hanbao@msu.edu

Matt Morency<sup>1,2</sup>  
Morency2@msu.edu

Winda Rianti<sup>3,4</sup>  
winda.rianti@faperta.unsika.ac.id  
ORCID ID: 0000-0002-3385-4630

Sompop Saeheng<sup>5</sup>  
sompop.saeheng@wsu.edu

Sanja Roje<sup>5</sup>  
sanja@wsu.edu  
ORCID ID: 0000-0002-6302-5382

Andreas P.M. Weber<sup>6</sup>  
Andreas.Weber@hhu.de  
ORCID ID: 0000-0002-5435-4387

Berkley Walker<sup>1,2,6</sup>  
berkley@msu.edu  
ORCID ID: 0000-0003-0970-4672

<sup>1</sup> Department of Energy-Plant Research Laboratory, Michigan State University, East Lansing, MI 48824, USA

<sup>2</sup> Department of Plant Biology, Michigan State University, East Lansing, MI 48824, USA

<sup>3</sup> Faculty of Agriculture, Universitas Singaperbangsa Karawang, Karawang 41361, Indonesia

<sup>4</sup> Department of Plant Science, Wageningen University, Wageningen, the Netherlands 6708PB

<sup>5</sup> Institute of Biological Chemistry, Washington State University, Pullman, WA 99164, USA

<sup>6</sup> Institute of Plant Biochemistry, Cluster of Excellence on Plant Sciences, Heinrich-Heine-University, Düsseldorf, Germany 40225

1 **One Sentence Summary:**

2 Catalase guards against additional carbon loss from photorespiration arising from non-  
3 enzymatic decarboxylations of photorespiratory intermediates.

4

5 **List of Author Contributions:**

6 B.J.W. conceived the original research plans and supervised the research with input from  
7 A.W., H.B., L.G., M.M., A.W., and S.R. B.J.W. wrote the paper. Further experimental work and  
8 analysis was performed by W.R. and S.S.

9

10 **Funding Information:**

11 B.J.W. was funded under a postdoctoral research fellowship from the Alexander von  
12 Humboldt Foundation during the initial experimental work and by the Division of Chemical  
13 Sciences, Geosciences and Biosciences, Office of Basic Energy Sciences of the United States  
14 Department of Energy (DE-FG02-91ER20021) and National Science Foundation awards  
15 from the Division of Integrative Organismal Systems (2030337) and Division of Molecular  
16 and Cellular Biosciences (2015843) during the writing of the manuscript. A.W. was funded  
17 by the Deutsche Forschungsgemeinschaft (DFG, German Research Foundation) under  
18 Germany's Excellence Strategy – EXC-2048/1 – Project ID: 390686111, and IRTG 2466.  
19 Sanja Roje was funded under Division of Molecular and Cellular Biosciences (2015828).

20

21

22

23

24

25

26

27

28

## 29 **Abstract**

30 Photorespiration recovers carbon that would be otherwise lost following the oxygenation  
31 reaction of rubisco and production of glycolate. Photorespiration is essential in plants and  
32 recycles glycolate into usable metabolic products through reactions spanning the chloroplast,  
33 mitochondrion, and peroxisome. Catalase in peroxisomes plays an important role in this  
34 process by disproportionating  $H_2O_2$  resulting from glycolate oxidation into  $O_2$  and water. We  
35 hypothesize that catalase in the peroxisome also protects against non-enzymatic  
36 decarboxylations between hydrogen peroxide and photorespiratory intermediates (glyoxylate  
37 and/or hydroxypyruvate). We test this hypothesis by detailed gas exchange and biochemical  
38 analysis of *Arabidopsis thaliana* mutants lacking peroxisomal catalase. Our results strongly  
39 support this hypothesis, with catalase mutants showing gas exchange evidence for an increased  
40 stoichiometry of  $CO_2$  release from photorespiration, specifically an increase in the  $CO_2$   
41 compensation point, a photorespiratory-dependent decrease in the quantum efficiency of  $CO_2$   
42 assimilation, increase in the  $^{12}CO_2$  released in a  $^{13}CO_2$  background and an increase in the post-  
43 illumination  $CO_2$  burst. Further metabolic evidence suggests this excess  $CO_2$  release occurred  
44 via the non-enzymatic decarboxylation of hydroxypyruvate. Specifically, the catalase mutant  
45 showed an accumulation of photorespiratory intermediates during a transient increase in  
46 rubisco oxygenation consistent with this hypothesis. Additionally, end products of alternative  
47 hypotheses explaining this excess release were similar between wild type and catalase mutants.  
48 Furthermore, the calculated rate of hydroxypyruvate decarboxylation in catalase mutant is  
49 much higher than that of glyoxylate decarboxylation. This work provides evidence that these  
50 non-enzymatic decarboxylation reactions, predominately hydroxypyruvate decarboxylation, can  
51 occur *in vivo* when photorespiratory metabolism is genetically disrupted.

## 52 **Introduction**

53 Photorespiration is the single largest limitation to C3 photosynthesis under current  
54 atmospheres, consuming ~30-40% of total plant energy in the light and resulting in rates of CO<sub>2</sub>  
55 loss approaching 25% the rate of net CO<sub>2</sub> fixation (Sharkey 1988; Walker et al. 2016b). Given  
56 this major role in determining net rates of energy use and CO<sub>2</sub> exchange, it is vital to  
57 understand the biochemical underpinnings of photorespiration to both accurately model plant  
58 productivity in response to changing climates and design optimization strategies for improving  
59 net photosynthesis. Improvement strategies targeting photorespiration have been showing  
60 initial promise both under laboratory conditions (Timm et al. 2012) and more recently under in-  
61 field experiments (South et al. 2019), however; future efforts in optimization and improved  
62 modeling may require a more mechanistic understanding of the function of native  
63 photorespiration.

64 Photorespiration recycles 2-phosphoglycolate (2-PG) produced following the reaction of  
65 ribulose 1,5-bisphosphate (RuBP) with O<sub>2</sub> as catalyzed by the first enzyme of the C3 cycle, RuBP  
66 carboxylase/oxygenase (rubisco). This recycling pathway comprises over a dozen enzymatic  
67 conversions and transport steps spanning the chloroplast, peroxisome and mitochondria and  
68 results in the partial recycling of 2-PG into the C3-cycle intermediate 3-phosphoglycerate (3-  
69 PGA) with the loss of CO<sub>2</sub> and energy (Figure 1, (Foyer and Noctor 2009; Bauwe et al. 2010). The  
70 CO<sub>2</sub> loss from photorespiration is assumed to come primarily from glycine decarboxylation in  
71 the mitochondria, resulting in a stoichiometric release of 0.5 CO<sub>2</sub> per rubisco oxygenation  
72 (Somerville and Ogren 1980; Somerville 2001; Abadie et al. 2016). The stoichiometric release of  
73 CO<sub>2</sub> per rubisco oxygenation is a cornerstone assumption for biochemical models of leaf  
74 photosynthesis, which represent net CO<sub>2</sub> fixation rates in scales ranging from the single cell to  
75 the entire globe (Farquhar et al. 1980; von Caemmerer and Farquhar 1981; von Caemmerer  
76 2013; Sun et al. 2014).

77 While there is strong evidence that glycine decarboxylation is the predominate source  
78 of CO<sub>2</sub> loss from photorespiration, there are other potential reactions that can result in  
79 additional CO<sub>2</sub> loss including the non-enzymatic decarboxylation (NED) of glyoxylate (Halliwell  
80 and Butt 1974; Grodzinski 1978) and/or hydroxypyruvate by H<sub>2</sub>O<sub>2</sub> (Cousins et al. 2008; Keech et

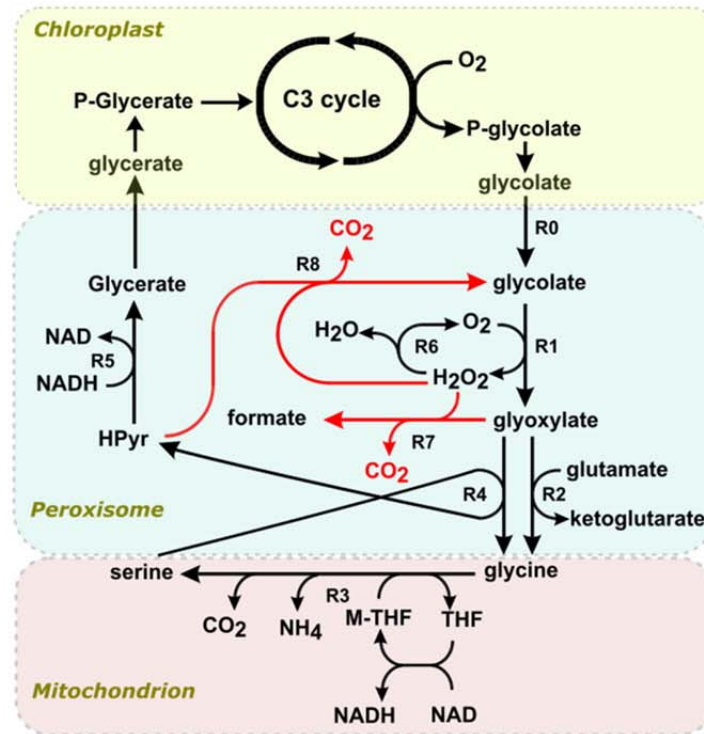

**Figure 1.** Schematic representation of photorespiration model developed in this work.

Enzymatic reactions (R1-R6) typically associated with photorespiration are shown in black while non-enzymatic decarboxylation reactions (R7-R8) are shown in red. R0 represents transport of glycolate into the peroxisomes. Glycolate oxidase (R1) catalyzes the conversion of glycolate to glyoxylate and  $H_2O_2$ . The latter molecule is decomposed to oxygen and water by catalase (R6). Glyoxylate is aminated by either glutamate glyoxylate aminotransferase (R2) or serine glyoxylate transaminase (R4) to produce glycine. Glycine is then decarboxylated to produce serine while releasing  $CO_2$ ,  $NH_4$ , cycling tetrahydrofolate (THF) and methyl-THF (M-THF) and reducing NAD by a multienzyme complex, glycine-cleavage system, in the mitochondria. This conversion of glycine to serine is modelled as a single reaction (R3) where flux in R3 equally contributes to serine and  $CO_2$  formation. Hydroxypyruvate (HPyr) produced through serine glyoxylate transaminase (R4) is reduced by hydroxypyruvate reductase (R5) to form glycerate, which is transported back to the chloroplast for incorporation into the C3 cycle. Non-enzymatic decarboxylations can occur either between glyoxylate and  $H_2O_2$  (R7) or between HPyr and  $H_2O_2$  (R8), both releasing  $CO_2$  in the process. Note that the process of photorespiration involves different compartments however, compartmentalization has not been taken into consideration in this model. The concentrations of the intermediates NAD, NADH, glutamate, THF, M-THF and  $O_2$  are assumed to be present in excess to drive the associated reaction at maximal rate.

81 al. 2012). NED reactions would reduce the carbon recycling efficiency of photorespiration by  
 82 increasing the stoichiometric release of  $CO_2$  per rubisco oxygenation by up to 400%, assuming  
 83 they processed all of the photorespiratory flux (Cousins et al. 2011). While early *in vitro*  
 84 experiments offered support for the importance of NED reactions in explaining *in vivo*  $CO_2$  loss

85 in wild type (WT) plants (Halliwell and Butt 1974; Grodzinski and Butt 1976; Grodzinski 1978),  
86 subsequent genetic and flux labeling experiments demonstrate that glycine decarboxylation  
87 explains the majority of CO<sub>2</sub> loss *in vivo*, at least under ambient (20-25 °C) conditions  
88 (Somerville and Ogren 1980; Somerville 2001; Abadie et al. 2016). These findings indicate that  
89 catalase activity, which detoxifies H<sub>2</sub>O<sub>2</sub> in the peroxisome, may be present in high enough levels  
90 to inhibit NED reactions under the conditions measured in WT plants, at least under ambient  
91 temperatures.

92 When photorespiration is disrupted genetically, however, there is evidence that NED  
93 reactions drive excess carbon loss. For example, *hpr* mutants lacking peroxisomal  
94 hydroxypyruvate reductase (HPR) have increased photorespiratory CO<sub>2</sub> compensation points  
95 ( $\Gamma^*$ ) and release of CO<sub>2</sub>, (Cousins et al. 2008; Cousins et al. 2011; Timm et al. 2008; Keech et al.  
96 2012), demonstrating an increase in the stoichiometry of CO<sub>2</sub> released per rubisco oxygenation  
97 (See Theory). Additionally, mutants lacking the foliar-expressed catalase (CAT) isoform (*cat2*)  
98 similarly showed increases in the compensation point ( $\Gamma$ ) and other gas exchange signatures of  
99 CO<sub>2</sub> release from photorespiration, but this was measured under a limited set of conditions and  
100 not assessed using approaches that allow measurements under ambient CO<sub>2</sub> concentrations  
101 (Keech et al. 2012). Furthermore, additional evidence is needed to establish *which* NED  
102 reactions (glyoxylate or hydroxypyruvate decarboxylation) explain this *in vivo* instance of excess  
103 carbon loss from photorespiration and that catalase specifically plays a critical role in protecting  
104 against this excess loss in WT plants.

105 In this work, we present gas exchange and metabolic data to demonstrate that catalase  
106 mutants show an increase in the stoichiometry of CO<sub>2</sub> release per rubisco oxygenation and this  
107 excess CO<sub>2</sub> release from photorespiration most likely comes from decarboxylation of  
108 hydroxypyruvate by H<sub>2</sub>O<sub>2</sub>. These findings suggest catalase plays a critical role in guarding  
109 against additional wasteful loss of CO<sub>2</sub> from photorespiration and provide a set of approaches  
110 that could be used to examine the mechanisms governing the efficiency of CO<sub>2</sub> release from  
111 photorespiration under elevated temperatures in WT plants.

## 112 **Theory**

## 113 Gas exchange theory

114 The presence of additional decarboxylation reactions during photorespiration was examined  
115 using various gas exchange approaches; specifically, measurements of  $\Gamma^*$ ,  $\Gamma$ , and the quantum  
116 efficiency of CO<sub>2</sub> fixation ( $\Phi_{\text{CO}_2}$ ) measured under differing photorespiratory conditions. Each of  
117 these measurements are impacted by the amount of CO<sub>2</sub> released per rubisco oxygenation  
118 from photorespiration *in vivo* as described below.

119  $\Gamma^*$  is a key parameter that links plant biochemistry to rates of net gas exchange by  
120 combining rubisco specificity for reaction of CO<sub>2</sub> relative to O<sub>2</sub> ( $S_{c/o}$ ) with oxygen concentration  
121 (O) and the amount of CO<sub>2</sub> lost from photorespiration per rubisco oxygenation ( $\eta$ ) according to

$$\Gamma^* = \frac{\eta O}{S_{c/o}} \quad \text{Equation 1}$$

122 (Farquhar et al. 1980; von Caemmerer and Farquhar 1981; von Caemmerer 2013). Since  $\Gamma^*$  is  
123 proportional to  $\eta$  and NED reactions increase  $\eta$ , differences in  $\Gamma^*$  can indicate changes in the  
124 amount of CO<sub>2</sub> released from photorespiration due to increases in NED reactions, especially  
125 when measurements are done under the same O and in the same species with identical  $S_{c/o}$ .

126  $\Gamma$  is a more readily measured parameter, but is more indirectly related to  $\eta$  since it  
127 measures the CO<sub>2</sub> compensation point where a leaf assimilates as much CO<sub>2</sub> as it releases from  
128 both photorespiration and non-photorespiratory CO<sub>2</sub> loss in the light ( $R_L$ ) according to  
129

$$\Gamma = \frac{\Gamma^* + K_c \left(1 + \frac{O}{K_o}\right) R_L / V_{c,max}}{1 - R_d / V_{c,max}} \quad \text{Equation 2}$$

130 where  $K_c$ ,  $K_o$ ,  $R_L$  and  $V_{c,max}$  are the Michaelis-Menten enzyme constants of Rubisco for CO<sub>2</sub>, O<sub>2</sub>,  
131 rate of mitochondrial respiration in the day and maximum rate of Rubisco carboxylation. Since  
132  $\Gamma$  is also dependent on  $\Gamma^*$ , it is similarly impacted by changes in  $\eta$  driven by NED reactions.

133 A third test for the presence of NED reactions during photorespiration is in  
134 measurements of  $\Phi_{\text{CO}_2}$ . Since  $\Phi_{\text{CO}_2}$  represents net CO<sub>2</sub> fixation per absorbed photon of light,

135  $\Phi_{\text{CO}_2}$  should decrease when total amounts of  $\text{CO}_2$  lost from photorespiration increase and  
136 reduce net  $\text{CO}_2$  fixation. The total rate of  $\text{CO}_2$  lost from photorespiration is equal to  $\eta$  multiplied  
137 by rates of rubisco oxygenation ( $V_o$ ), so  $V_o$  dependent decreases in  $\Phi_{\text{CO}_2}$  would provide further  
138 evidence for the presence of NED reactions.  
139



## 140 **Results**

### 141 **Measurements of $\Gamma^*$ and $\Gamma$ were higher in *cat2***

142 To determine if *cat2* had elevated compensation points consistent with an increase in CO<sub>2</sub>  
143 release per rubisco oxygenation,  $\Gamma^*$  and  $\Gamma$  were measured using the common intersection  
144 method (Walker and Ort 2015; Walker et al. 2016a).  $\Gamma^*$  in *cat2* is 30% greater than in the WT  
145 under 25 °C (Supplemental Figure 1). This increase in  $\Gamma^*$  corresponds to an increase in CO<sub>2</sub>  
146 release per rubisco oxygenation from 0.5 to 0.64, assuming  $S_{c/o}$  stays constant (Equation 1).  
147 Furthermore,  $\Gamma$  was significantly higher for every light intensity used during the common  
148 intercept measurement of  $\Gamma^*$  except under the lowest light intensity (50  $\mu\text{mol m}^{-2} \text{s}^{-1}$ ),  
149 suggesting that the impact of deficient CAT activity is greatest under elevated rates of  
150 photorespiration (Supplemental Table I).

### 151 ***cat2* had a lower efficiency of net carbon assimilation under higher rates of** 152 **photorespiration**

153 The response of net assimilation to light intensity was used to determine if *cat2* had a  
154 photorespiratory-dependent decrease in  $\Phi_{\text{CO}_2}$  driven by increases in CO<sub>2</sub> release per rubisco  
155 oxygenation. Consistent with this hypothesis,  $\Phi_{\text{CO}_2}$  was much lower in *cat2* compared to the WT  
156 plants under the highest rates of rubisco oxygenation ( $v_o$ ), but not when  $v_o$  was low as  
157 measured under high CO<sub>2</sub> or low O<sub>2</sub> (Figure 2). Furthermore, the decrease in  $\Phi_{\text{CO}_2}$  of *cat2*  
158 compared to the WT plants followed a roughly linear trend with  $v_o$ . This trend is consistent  
159 when  $\Phi_{\text{CO}_2}$  is compared to the ratio  $v_o/v_c$ , with higher ratios in *cat2* showing lower efficiencies.  
160 Interestingly, under very high rates of photorespiration, *cat2* actually *loses* more CO<sub>2</sub> than is  
161 fixed as light intensity increases, resulting in a negative  $\Phi_{\text{CO}_2}$  (under 5 Pa CO<sub>2</sub>, Figure 2 and  
162 Supplemental Figure 2).

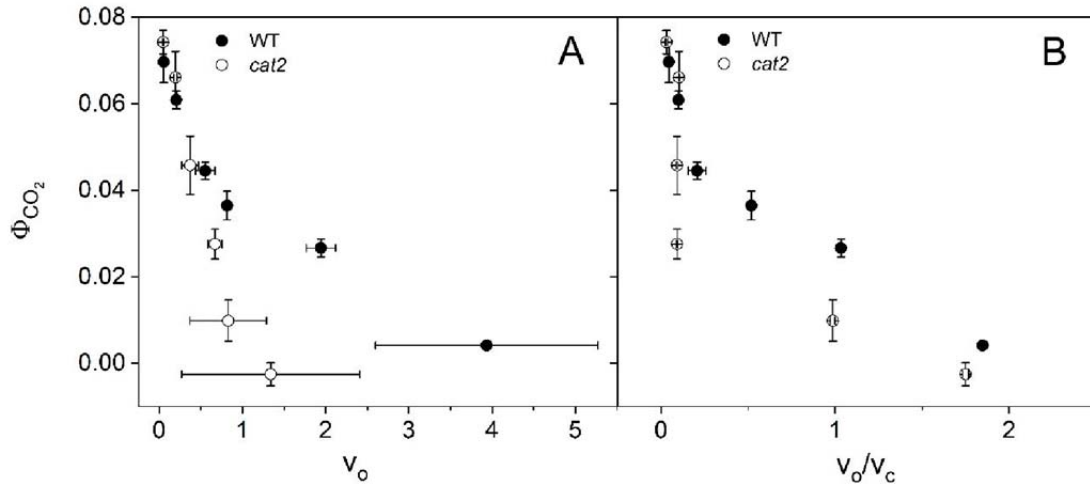

**Figure 2.** The response of the quantum efficiency of CO<sub>2</sub> fixation ( $\Phi_{CO_2}$ ) to different rates of Rubisco oxygenation ( $v_o$ , A) and the ratio of rubisco oxygenation to carboxylation ( $v_o/v_c$ , B) in *A. thaliana* wild type (WT) and plants lacking peroxisomal-type catalase expression (*cat2*).  $\Phi_{CO_2}$  was determined from the initial slopes of light response curves under various CO<sub>2</sub> and O<sub>2</sub> partial pressures measured using the LI-COR 6800 infra-red gas analyzer. Shown with  $n=5 \pm$  ster.

163 Fluorescence measurements indicate that decreases in  $\Phi_{CO_2}$  were not due to general  
 164 damage or inhibition to the core photosynthetic machinery of *cat2*, but indeed  
 165 photorespiratory-dependent. For example, *cat2* and WT have similar dark and light adapted  
 166 values of the quantum yield of photosystem II ( $F_v/F_m$  and  $F_v'/F_m'$ ) and rates of non-  
 167 photochemical quenching (NPQ, Supplemental Table II).

168 To determine if other, non-photorespiratory rates of CO<sub>2</sub> release changed with  
 169 photorespiratory conditions to reduce  $\Phi_{CO_2}$  we compared measurements of  $R_L$  between WT  
 170 and *cat2* under various CO<sub>2</sub> concentrations and O<sub>2</sub> concentrations. In all cases, there was either  
 171 no significant difference or there was a slightly lower  $R_L$  in *cat2*, suggesting that the observed  
 172 decreases in  $\Phi_{CO_2}$  are unlikely due to changes in non-photorespiratory CO<sub>2</sub> release  
 173 (Supplementary Figure 3).

#### 174 **The stoichiometry of CO<sub>2</sub> released per rubisco oxygenation increases in *cat2***

175 To confirm more directly that the *cat2* plants had an increase in CO<sub>2</sub> release per rubisco  
 176 oxygenation under higher light intensities, we next used membrane-inlet mass spectroscopy to

177 determine relative rates of CO<sub>2</sub> release from photorespiration per rubisco oxygenation. This  
178 was necessary since  $\Gamma^*$  and  $\Phi_{\text{CO}_2}$  are both measured under low light intensities due to the  
179 nature of the gas exchange approaches and we wanted to confirm this evidence for increased  
180 CO<sub>2</sub> release under more physiological conditions. Membrane-inlet mass spectroscopy  
181 determines rates of rubisco oxygenation and relative rates of CO<sub>2</sub> release from  
182 photorespiration from net fluxes of O<sub>2</sub> and CO<sub>2</sub> resolved from photosynthesis using isotopically  
183 enriched atmospheres (Cousins et al. 2008; Canvin et al. 1980). Measurements of the total  
184 <sup>12</sup>CO<sub>2</sub> released in the light under a saturating concentration of <sup>13</sup>CO<sub>2</sub> were higher in *cat2*,  
185 indicating that *cat2* had a higher efflux of CO<sub>2</sub> compared to WT (Supplemental Figure 4a). To  
186 ensure this release was not due simply to higher rates of rubisco oxygenation, and a true  
187 increase in the stoichiometric release of CO<sub>2</sub> per oxygenation, <sup>13</sup>CO<sub>2</sub> release was normalized by  
188 rates of rubisco oxygenation (Supplemental Figure 4b). This normalization also showed that the  
189 stoichiometric release of CO<sub>2</sub> per rubisco oxygenation was higher in *cat2* compared to WT,  
190 consistent with additional non-enzymatic decarboxylation reactions from photorespiration.

### 191 **Evidence for higher and alternate sources of CO<sub>2</sub> release from the post-illumination** 192 **burst and photorespiratory isotopic fractionation**

193 To determine how prevalent these increases in CO<sub>2</sub> release in *cat2* are under ambient CO<sub>2</sub>  
194 concentrations, we next measured the post-illumination burst (PIB). The PIB refers to the burst  
195 of CO<sub>2</sub> released from leaves immediately after a light to dark transition (Bulley and Tregunna  
196 1971; Doehlert et al. 1979). Although the PIB is not a strictly quantitative measurement, it can  
197 be used to estimate the amount of CO<sub>2</sub> release from photorespiration. Our measurements of  
198 the PIB revealed that the total CO<sub>2</sub> release following a period of illumination was higher in *cat2*  
199 as compared to WT (Figure 3a). Furthermore, the PIB peak was integrated to determine the  
200 magnitude of total CO<sub>2</sub> release during PIB. The data shows that the CO<sub>2</sub> evolution in *cat2* was  
201 nearly two-fold greater than WT (Figure 3b), reflecting an increased stoichiometry of CO<sub>2</sub>  
202 release per rubisco oxygenation.

### 203 **Metabolic transients, formate and folic acid concentrations suggest** 204 **hydroxypyruvate decarboxylation releases excess CO<sub>2</sub> in *cat2***

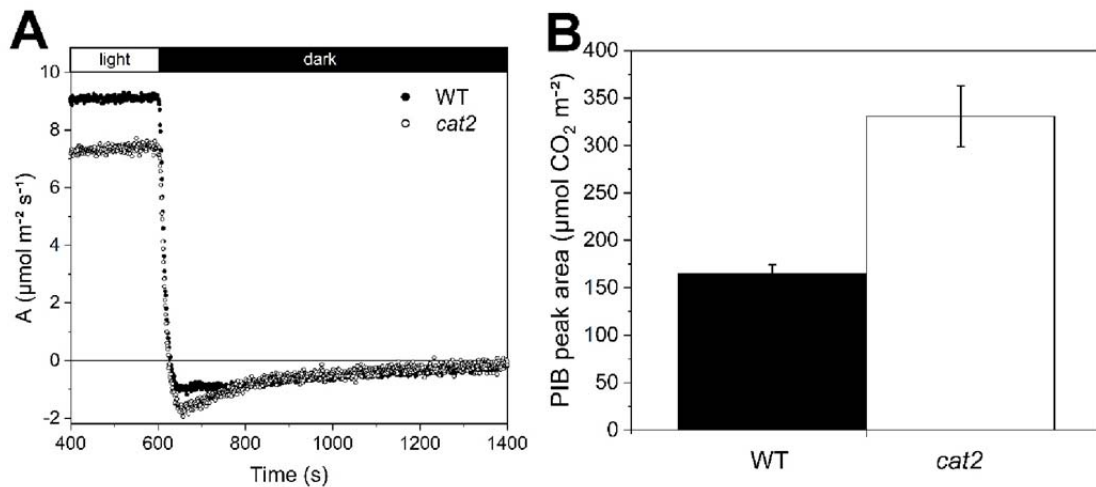

**Figure 3.** Post-Illumination Burst of CO<sub>2</sub> (PIB) in *A. thaliana* wild type (WT) and plants lacking peroxisomal-type catalase expression (*cat2*). (A) Changes in the rate of uptake and release of CO<sub>2</sub> were measured during a 40-min light period followed by a 20-min dark period using the LI-COR 6800 infra-red gas analyzer. (B) Quantification of PIB by integration of peak area of CO<sub>2</sub> release. Shown with  $n=5 \pm \text{ster}$ .

205 To resolve the origin of this excess CO<sub>2</sub> release from photorespiration, we next examined the  
206 response of photorespiratory metabolites during a transient period of increasing  
207 photorespiration induced by measuring a plant switching from a low to high light condition.  
208 Metabolite concentrations can be more informative when measured under transient  
209 conditions, before a new steady-state is established (Abadie et al. 2016). Specifically, we  
210 hypothesized that if glyoxylate NED explained this excess release, more carbon would leave  
211 photorespiration in the form of formate, decreasing the pool sizes of intermediates  
212 downstream of glyoxylate (glycine, serine, hydroxypyruvate and glycerate) during transient  
213 increases in photorespiratory flux in *cat2* as compared to WT (Figure 1). Alternatively,  
214 hydroxypyruvate NED forms the photorespiratory intermediate glycolate, meaning that this  
215 NED reaction should result in relative increases in photorespiratory intermediate pools (for a  
216 given change in  $v_o$ ) as carbon is maintained in the cycle in *cat2* as compared to WT.

217 Our transient time-course measurements showed higher relative pool sizes of  
218 photorespiratory intermediates in *cat2*, supporting NED of hydroxypyruvate as the source of  
219 excess CO<sub>2</sub> release (Figure 4). Specifically, all photorespiratory metabolites increased more with

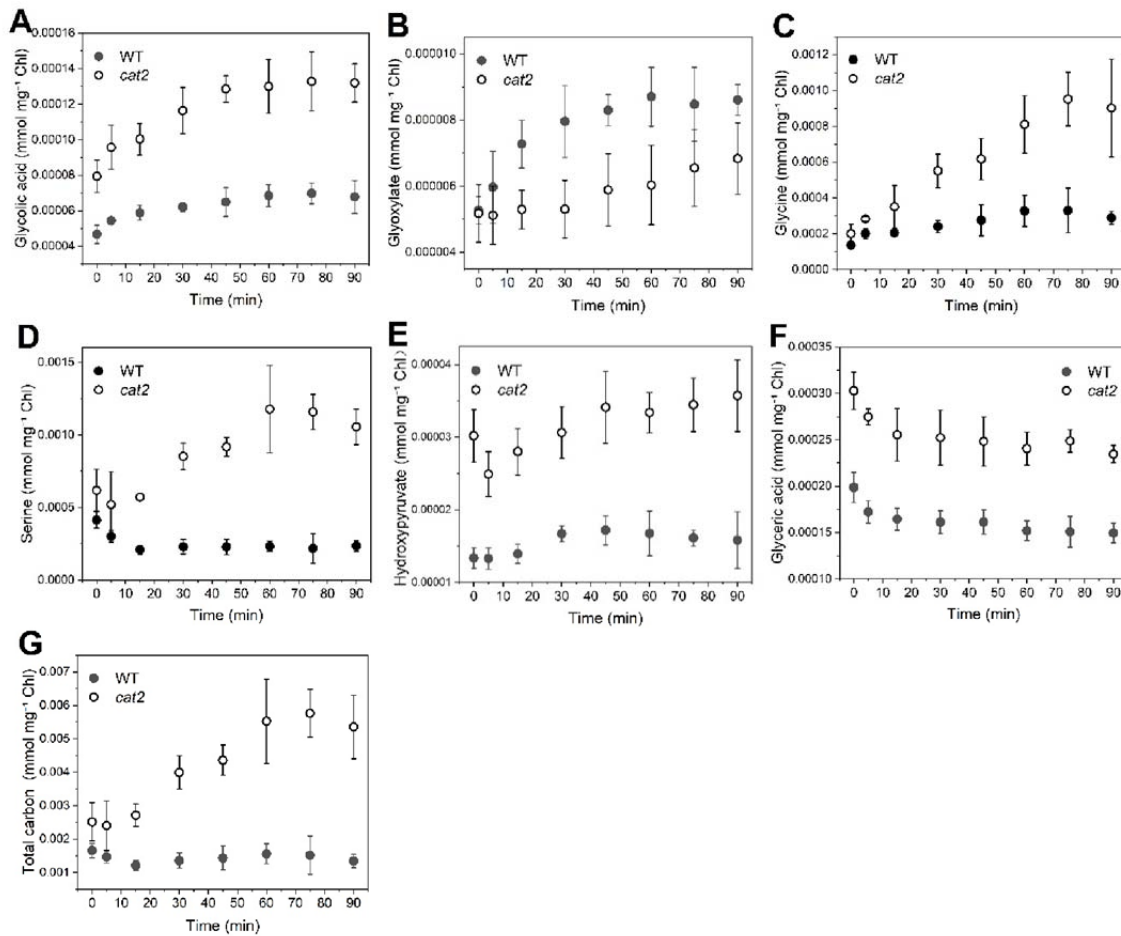

**Figure 4.** Metabolic changes in photorespiration upon transfer from low to high light for *A. thaliana* wild type (WT) and plants lacking peroxisomal-type catalase expression (*cat2*). Irradiance changes were from 50 to 400  $\mu\text{E m}^{-2} \text{s}^{-1}$ . Concentrations of glycolate (A), glyoxylate (B), glycine (C), serine (D), Hydroxypyruvate (E) and glycerate (F) were detected by GC-MS. Total carbon concentrations (G) were calculated based on the above concentrations except for glycerate. The data are given as mean ( $n=5$ )  $\pm$  ster.

220 increased photorespiratory rates in *cat2*, except for glyoxylate (Figure 4). This general trend is  
 221 consistent with more carbon staying within the photorespiratory cycle in *cat2*, as expected with  
 222 the NED of hydroxypyruvate to glycolate, which would maintain more carbon in  
 223 photorespiration as opposed to converting hydroxypyruvate to glycerate (Figure 1). These  
 224 general trends, however, could be explained if *cat2* had higher relative rates of  $v_o$  during this  
 225 light transient.

226 Complementary gas exchange data showed that these differences in metabolite  
 227 responses are not associated with a higher rate of  $v_o$  in *cat2*. The rates of  $v_o$  increased

228 immediately upon exposure to high light, as shown by  $v_o$  estimated from gas exchange  
229 measurements made over a similar period (Supplemental Figure 5). Moreover, the two light  
230 induction curves were almost identical, indicating similar rates of glycolate influx between WT  
231 and *cat2*. However, WT and *cat2* had very different metabolic responses during the  
232 photorespiratory transient. For example, the pool size of glycolate in *cat2* had a greater  
233 proportional increase than that in WT (Figure 4A). Similar trends were also observed for glycine,  
234 serine and hydroxypyruvate (Figure 4C, D, E), while the opposite trend was seen for glyoxylate  
235 (Figure 4B).

236 The above results show how each individual metabolite responded to the transient but  
237 to understand how much total carbon was present in the photorespiratory intermediates at  
238 each timepoint, we determined the total carbon within photorespiration by summing the  
239 carbon present in each individual metabolite. We calculated total carbon concentration based  
240 on the five metabolite pools between glycolate and hydroxypyruvate (Figure 4G, glycolate,  
241 glyoxylate, glycine, serine, and hydroxypyruvate). These carbon pools should increase in total in  
242 the presence of hydroxypyruvate NED during an increase in photorespiration. Our data showed  
243 that, compared to a relatively flat response curve in WT, a larger amount of carbon  
244 accumulated in *cat2* as compared to WT during the transient period, consistent with this  
245 hypothesis (Figure 4G).

246 Formate is a product of glyoxylate NED. Formate can either be decarboxylated in the  
247 mitochondria, or enter one carbon metabolism (a cycle involving numerous folate species)  
248 following a reaction catalyzed by tetrahydrofolate ligase (Hanson and Roje 2001). To further  
249 test if this NED reaction also contributes to the excess carbon loss, we measured the contents  
250 of formate and its downstream folate species. If glyoxylate decarboxylation takes place *in vivo*,  
251 we might expect to see a higher level of formate and/or folates in *cat2*. However, our data  
252 shows that there is no significant difference between WT and *cat2* in formate or folate contents  
253 (Supplemental Figure 6), suggesting that the glyoxylate decarboxylation is not the predominant  
254 NED reaction under physiological conditions.

## 255 **Determining H<sub>2</sub>O<sub>2</sub> concentrations**

256 To determine if the metabolite concentrations that we measured were large enough to drive  
257 high rates of particular NED's, we needed to measure levels of H<sub>2</sub>O<sub>2</sub> in WT and *cat2* during the  
258 transient from low to high photorespiratory rates explored above. There is no difference in  
259 H<sub>2</sub>O<sub>2</sub> concentrations measured under the initially low photorespiratory rates (time t=0),  
260 implying that *cat2* has adapted to the stress of decreased catalase by activating alternate  
261 antioxidative systems for H<sub>2</sub>O<sub>2</sub> scavenging to compensate for the shortage in catalase.  
262 However, a large divergence was observed after a shift to high light. The H<sub>2</sub>O<sub>2</sub> level was  
263 elevated by ~50% in *cat2* and was reduced by ~40% in WT by the end of the transient (Figure  
264 5a). We hypothesize that the decrease in H<sub>2</sub>O<sub>2</sub> concentration under elevated light in WT might  
265 be due to the light activation of the catalase enzyme, but regardless, *cat2* plants had elevated  
266 H<sub>2</sub>O<sub>2</sub> content, a key substrate for NED's. To determine if the content of H<sub>2</sub>O<sub>2</sub> was large enough  
267 to drive NED, we next needed some additional parameterizations of the reaction.

268

269

## 270 **Parameterizing rate constants**

271 To determine if the metabolite concentrations that we measured are large enough to drive high  
272 rates of NED's we characterized the rate constants of the second-order reactions between H<sub>2</sub>O<sub>2</sub>  
273 and either glyoxylate and hydroxypyruvate. To characterize the NED's reaction order and rate  
274 constants, we measured the decay of H<sub>2</sub>O<sub>2</sub> and substrate following reaction with  
275 hydroxypyruvate or glyoxylate using UV spectroscopy at various concentrations of each  
276 reactant (Supplemental Figure 7). The response of the reaction rate was linearly related both to  
277 [H<sub>2</sub>O<sub>2</sub>] and either [glyoxylate] or [hydroxypyruvate], confirming that both reactions are  
278 described by a second-order rate equation. The rate constant for decarboxylation of glyoxylate  
279 with H<sub>2</sub>O<sub>2</sub> (7.5 L mol<sup>-1</sup> s<sup>-1</sup>) was higher than that describing reaction with hydroxypyruvate and  
280 H<sub>2</sub>O<sub>2</sub> (3.26 mol<sup>-1</sup> s<sup>-1</sup>).

## 281 **Estimating reaction rates of NED**

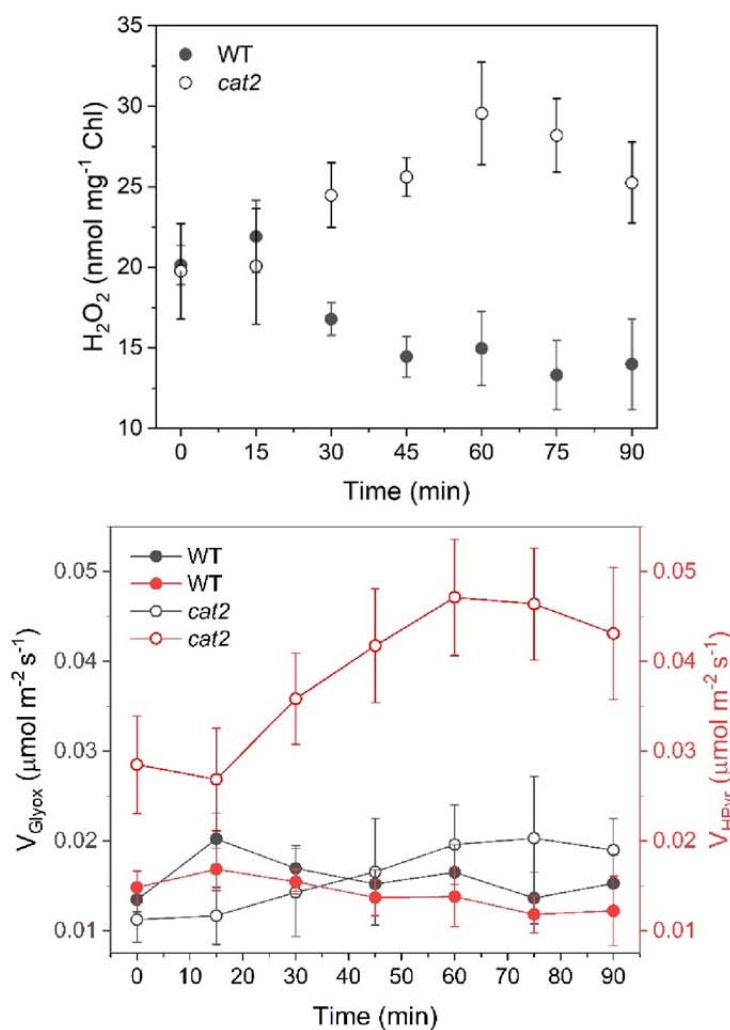

**Figure 5.** Hydrogen peroxide ( $H_2O_2$ ) changes in *A. thaliana* wild type (WT) and plants lacking peroxisomal-type catalase expression (*cat2*) upon transfer from low to high light (A) and comparison of reaction rates of glyoxylate decarboxylation (black) and hydroxypyruvate decarboxylation (red) in *A. thaliana* WT *cat2* (B). Concentrations of substrate ( $H_2O_2$ , glyoxylate and hydroxypyruvate) during transition from low to high light were the same as shown in Fig. 4 for calculation of decarboxylation rates. Rate constants and order were determined as described in Material and Method section. Data are expressed as mean ( $n=3-5$ )  $\pm$  ster.

282 The reaction rates of NED were determined by multiplying the second order rate constant by  
 283 the molar concentrations of the reactants ( $H_2O_2$  and glyoxylate/hydroxypyruvate). Among the  
 284 four NED reactions (two in WT and two *cat2*), hydroxypyruvate decarboxylation in *cat2* has the  
 285 highest rate throughout the transient period (Figure 5b). The rate of hydroxypyruvate  
 286 decarboxylation in *cat2* was approximately 2 to 5-fold greater than that of the other reactions.



287           The rates of this CO<sub>2</sub> loss estimated from hydroxypyruvate NED was ~5 fold lower than  
288 the excess CO<sub>2</sub> loss predicted from our gas exchange measurements when expressed on a leaf  
289 area basis. Specifically, the metabolite data estimates a loss of 0.03 to 0.05 μmol m<sup>-2</sup> s<sup>-1</sup>, but  
290 the gas exchange measurements suggest an excess rate of CO<sub>2</sub> release of 0.09 to 0.35 μmol m<sup>-2</sup>  
291 s<sup>-1</sup>. We attribute this discrepancy to underestimates of the highly reactive H<sub>2</sub>O<sub>2</sub> measured in  
292 our leaf tissues, a species that displays large variation in absolute values depending on study  
293 and assay technique (Queval et al. 2008). These results provide further evidence supporting the  
294 hydroxypyruvate decarboxylation as the predominant NED reaction and source of excess CO<sub>2</sub>  
295 release in *cat2*.

296

### 297 **Decarboxylation of Serine**

298 Besides decarboxylation reactions of photorespiration, there is one other photorespiratory-  
299 linked decarboxylation reaction that could release CO<sub>2</sub>. Serine decarboxylase catalyzes the  
300 conversion of serine to ethanolamine. Phosphorylated ethanolamine is the precursor for the  
301 biosynthesis of polar head groups of two phospholipids classes, phosphatidylcholine (PC) and  
302 phosphatidylethanolamine (PE). Since *cat2* had a larger pool size of serine (Figure 4D), we  
303 wondered whether this could drive a higher rate of serine decarboxylation. To test this  
304 hypothesis, we analyzed contents of PC and PE. Our data showed that there were no significant  
305 differences in the amount of PC or/and PE between WT and *cat2* (Figure 8A). Furthermore,  
306 fatty acid profiles of PC and PE were also similar (Figure 8B). These results further confirm that  
307 decarboxylation of hydroxypyruvate is unlikely to be the only predominant source of excess  
308 release of CO<sub>2</sub> in *cat2*.

### 309 **Total catalase activity**

310 To confirm and quantify the decrease in catalase activity in *cat2*, total catalase activity was  
311 measured via O<sub>2</sub> evolution. Catalase activity decreased in *cat2* by almost 80% when expressed  
312 both on a leaf area and protein content basis (Table I). Furthermore, the decrease in catalase  
313 activity was not accompanied by a decrease in total protein content.



## 315 Discussion

316 In this paper, we demonstrate that catalase protects against excess photorespiratory carbon  
317 loss and that this excess loss decreases net photosynthesis under ambient conditions. In *cat2*  
318 plants, both  $\Gamma^*$  and  $\Gamma$  were greater than in WT, which is explained by an increase in CO<sub>2</sub> release  
319 per rubisco oxygenation (Supplementary Figure 1 and Supplemental Table I). Additionally, *cat2*  
320  $\Phi_{\text{CO}_2}$  had a  $V_o$ -dependent decrease, which even became negative under high  $V_o$  indicating an  
321 extra loss of CO<sub>2</sub> that negatively impacted net photosynthesis and scaled with rates of  
322 photorespiration (Figure 2 and Supplemental Figure 1). Furthermore, *cat2* mutants had  
323 elevated <sup>12</sup>CO<sub>2</sub> release per rubisco oxygenation and a higher PIB peak area than WT, indicating  
324 a higher amount of CO<sub>2</sub> being released under physiological conditions (Supplemental Figure 4  
325 and Figure 3).

326 Our metabolite data strongly suggest that the source of this excess CO<sub>2</sub> release from  
327 photorespiration arises from the NED reaction between H<sub>2</sub>O<sub>2</sub> and hydroxypyruvate. Specifically,  
328 a larger carbon accumulation of photorespiratory intermediates formed in *cat2* mutant  
329 compared to WT during a period of increased photorespiration, suggesting a cyclic route of  
330 metabolic flux through photorespiration with NED decarboxylation of hydroxypyruvate to  
331 glycolate (Figure 4). Additionally, rates of hydroxypyruvate NED reactions predominated when  
332 calculated from measured metabolite pools and reaction rates, providing further evidence for  
333 the predominance of the hydroxypyruvate decarboxylation (Figure 5). Furthermore, we did not  
334 see evidence for alternative explanations of this loss as metabolite concentrations of  
335 downstream products of glyoxylate NED (formate and folates) were similar between WT and  
336 *cat2*, suggesting that the glyoxylate decarboxylation reaction is unlikely to account for the  
337 excess CO<sub>2</sub> release in *cat2* (Supplemental Figure 6). We also did not find evidence for elevated  
338 downstream products of serine decarboxylation as PC, PE and fatty acid profiles were similar  
339 between *cat2* and WT (Supplemental Figure 8).

340 There are other enzymatic decarboxylation reactions that have received attention  
341 recently that could help explain this increased CO<sub>2</sub> loss. The import of glucose 6-phosphate  
342 (G6P) into the chloroplast could stimulate a G6P shunt that follows the oxidative branch of the  
343 pentose phosphate pathway around Calvin-Benson cycle and thus increasing CO<sub>2</sub> release in the

344 light (Sharkey and Weise 2016). It has been hypothesized that the G6P shunt could cause more  
345 CO<sub>2</sub> release and lead to an increase in R<sub>L</sub>. Our data, showing no significant difference in R<sub>L</sub>  
346 between WT and *cat2*, do not support that the excess CO<sub>2</sub> release in *cat2* is due to additional  
347 CO<sub>2</sub> release through the G6P shunt (Supplemental Figure 3). However, because R<sub>L</sub> was  
348 determined under low CO<sub>2</sub> concentrations and low light intensities, we could not exclude the  
349 possibility of excess CO<sub>2</sub> released from G6P shunt under more physiological conditions.  
350 Alternatively, recent work highlights the potential for amino acid synthesis to contribute to CO<sub>2</sub>  
351 release in a non-targeted metabolic analysis on sunflower showing that CO<sub>2</sub> and O<sub>2</sub> mole  
352 fraction changes the flux through several pathways involved in amino acid synthesis (Abadie  
353 and Tcherkez 2021). The CO<sub>2</sub> release associated with these pathways was proposed to have  
354 potential impact on the amount of CO<sub>2</sub> release per oxygenation, but it is difficult to evaluate  
355 this claim without quantitative flux estimates. Future labeling work combined with formal flux  
356 estimates should help resolve this source most conclusively (Xu et al. 2021), but is outside of  
357 the scope of the current work.

358         This work identifies a probable mechanism for excess CO<sub>2</sub> release measured in mutants  
359 with perturbed photorespiratory metabolism but the presence of NED reactions during  
360 photorespiration may not be limited to mutant plants with a disrupted photorespiratory  
361 pathway (Cousins et al. 2008; Cousins et al. 2011; Keech et al. 2012). Photorespiration is  
362 impacted by changes in temperature in ways that could drive NED in WT plants. For example,  
363 the activity of glycolate oxidase increases more with temperature than catalase, possibly driving  
364 NED reactions (Grodzinski and Butt 1977). Additionally, post-translational modifications may  
365 modulate catalase activity, which could further modulate NED independently from protein  
366 content if activities were kept too low. For example, CAT2 contains a single phosphorylation site  
367 spanning residues 79-91 that is phosphorylated in response to nitrogen starvation (Hodges et  
368 al. 2013; Engelsberger and Schulze 2012). An increase in CO<sub>2</sub> release per oxygenation under  
369 elevated temperatures would explain discrepancies in measurements of  $\Gamma^*$  across many  
370 species, resulting in up to a 20% increase in the amount of carbon dioxide a plant loses per  
371 Rubisco oxygenation reaction (Walker and Cousins 2013). If present, this increase in CO<sub>2</sub>  
372 released from photorespiration could present a potential route for improving the carbon

373 recycling efficiency of photorespiration and subsequent net rates of CO<sub>2</sub> fixation at elevated  
374 temperatures.

## 375 **Materials and methods**

### 376 **Plant Material and Growth**

377 *A. thaliana cat2* mutants (At4G35090, SALK 076998) were provided by Dr. Graham Noctor  
378 (Queval et al. 2007). WT and *cat2* plants used for measurements of  $\Gamma$ ,  $\Gamma^*$  and  $\Phi_{PS2}$  were grown  
379 under a 12/12 day/night cycle at 90  $\mu\text{mol photons m}^{-2} \text{s}^{-1}$  and 23/18 °C on a standard soil  
380 substrate A210 (Stender, Germany). WT and *cat2* plants used for PIB, membrane inlet and  
381 metabolic analysis were grown under a 11/13 day/night cycle at 100  $\mu\text{mol photons m}^{-2} \text{s}^{-1}$  and  
382 23/18 °C.

### 383 **Steady-state Gas exchange**

384 Gas exchange was performed on the youngest, fully-expanded leaves of 4-6 week plants using a  
385 LI-6800 with a 3X3 cm measuring head (Li-COR Biosciences, Lincoln, Nebraska, USA). After  
386 measurements, leaf area enclosed by the cuvette was determined using the ImageJ FIJI  
387 distribution (Schneider et al. 2012; Schindelin et al. 2012). During all gas exchange  
388 measurements, leaf temperature was maintained at 25 °C and vapor pressure deficit was  
389 controlled at either 1 or 1.5 kPa for 25 °C. Measurements were performed in a climate-  
390 controlled chamber set to the measurement temperature.

391  $\Gamma^*$  values were measured using the common intersection method using slope-intercept  
392 regression (Laisk 1977; Walker and Ort 2015; Walker et al. 2016a) and light intensities of 250,  
393 165, 120, 80 and 50  $\mu\text{mol photons m}^{-2} \text{s}^{-1}$ . No significant Kok effect was seen in light response  
394 curves measured at or above the light intensities used in  $\Gamma^*$  measurements. Slope and intercept  
395 values were determined from the linear portion of CO<sub>2</sub>-response curves measured under each  
396 light intensity and CO<sub>2</sub> concentrations between 10 and 3 Pa CO<sub>2</sub> for determination of the  
397 common intersection value, which is equal to the intercellular CO<sub>2</sub> concentration ( $C_i^*$ ) at  
398  $\Gamma^*$  according to the equation  $\Gamma^* = C_i^* - R_L / g_m$  where  $R_L$  is determined from the y-axis value of

399 the common intersection point and  $g_m$  was assumed to be 2.23 and 2.01 mol m<sup>-2</sup> s<sup>-1</sup> MPa<sup>-1</sup> for  
400 25 °C according to the temperature response measured previously in *A. thaliana* (Walker et al.  
401 2013).

402 Light response curves for determining  $\Phi_{CO_2}$  values were measured under various CO<sub>2</sub>  
403 and O<sub>2</sub> environments controlled either using the native Li-COR 6800 functionality for CO<sub>2</sub> or a  
404 synthetic N<sub>2</sub> and O<sub>2</sub> mixing system comprised of two mass flow controllers (red-y series, Vögtlin  
405 Instruments, Switzerland). Plants were acclimated under 250 μmol photons m<sup>-2</sup> s<sup>-1</sup> before being  
406 measured under 65, 50, 45, 40, 35, 30, 25 and 20 μmol photons m<sup>-2</sup> s<sup>-1</sup>. For measurements of  
407  $\Phi_{CO_2}$ , the slope of CO<sub>2</sub> assimilation vs absorbed light intensity was determined from Kok effect-  
408 free portions of the initial slope assuming a leaf absorbance of 0.843. For each condition, rates  
409 of  $V_o$  and the ratio  $V_o/V_c$  were determined as described previously from the gas exchange  
410 measurements (Walker et al. 2014). Calculations of  $V_o$  and  $V_o/V_c$  were made using chloroplastic  
411 CO<sub>2</sub> concentrations calculated assuming a mesophyll conductance ( $g_m$ ) of 2.2 μmol m<sup>-2</sup> s<sup>-1</sup> Pa<sup>-1</sup>  
412 from the intercellular CO<sub>2</sub> concentrations measured at a point midway through the linear  
413 section of the light response curve (usually at 35 μmol photons m<sup>-2</sup> s<sup>-1</sup>). While each light  
414 intensity across this range had slightly different  $V_o$  values, the relationship was linear overall,  
415 indicating that  $\Phi_{CO_2}$  appeared to be constant across the range and justifying a single  
416 representative  $V_o$  to be used (Fig. 3). Additionally, since the intercellular CO<sub>2</sub> concentration was  
417 not greatly impacted across this range due to similar rates of net assimilation,  $V_c/V_o$  was very  
418 constant across the light intensities used to determine  $\Phi_{CO_2}$ . Respiration in the light was  
419 estimated according to the method of Kok (Kok 1948). Light-response curves were measured as  
420 sub-saturating light intensities. The rate of day respiratory ( $R_L$ ) was determined by the y-  
421 intercept by extending the part of light response curve after the compensation point to y-axis,  
422 removing any potential inflections due to the Kok effect.

### 423 **Membrane-inlet mass spectroscopy**

424 Membrane-inlet mass spectroscopy was measured on leaf disks enclosed in a custom-built,  
425 thermostatted cuvette that allowed for inlet sampling and introduction of modified isotopic  
426 backgrounds (Cousins et al. 2008; Walker and Cousins 2013). The cuvette was built with

427 multiple sampling and gas-release ports fitted with sampling septa. The membrane was  
428 composed of 0.005" fluorinated ethylene propylene film (CS Hyde Company, Lake Villa, IL, USA).  
429 The inlet line passed over a water trap maintained a few centimeters above liquid nitrogen. This  
430 was necessary to reach temperatures low enough to trap water at the low inlet pressures but  
431 not too low to freeze out carbon dioxide. The inlet line was passed into the ionizing source of a  
432 PrismaPlus Quadrupole Mass spectrometer (Pfeiffer Vacuum), which cycled through relevant  
433 masses for detection via an amplified faraday cup. The mass spec, roughing pump and turbo  
434 pump and time-resolved data collection software were provided by Bay Instruments (Port  
435 Easton MD, USA).

436 Measurements were made following a daily oxygen and carbon dioxide calibration and  
437 followed previous regimes and calculations (Cousins et al. 2008; Walker and Cousins 2013;  
438 Canvin et al. 1980). In brief, the leaf disk was placed within the chamber and sealed. The  
439 chamber was then flushed with nitrogen gas and  $^{18}\text{O}_2$  gas was injected to reach the desired  
440 atmosphere. Rates of dark  $\text{CO}_2$  release,  $^{18}\text{O}_2$  uptake and  $^{16}\text{O}_2$  release/leaks were monitored for  
441 ~10 minutes before a custom-built LED light source was turned on. Rates of gas exchange were  
442 further monitored until a steady-state was reached and the chamber was injected with a  
443 saturating volume of  $^{13}\text{CO}_2$ . Following this injection,  $^{12}\text{CO}_2$  release from photorespiration was  
444 monitored. A  $\text{CO}_2$  zero measurement was made before and after each experimental run by  
445 momentarily dipping the water trap into the liquid nitrogen. Time resolved mass spectrometer  
446 data was then processed by a pipeline of in-house python scripts to apply the necessary per volt  
447 calibrations and calculate the final rates of oxygen exchange,  $v_o$ ,  $v_c$  and  $^{12}\text{CO}_2$  release in a  $^{13}\text{CO}_2$   
448 background. All processing scripts and chamber designs are available upon request.

### 449 **Post-illumination Burst (PIB)**

450 The post-illumination burst of  $\text{CO}_2$  was measured using a LI-COR-6800 as described previously.  
451 During each measurement, the leaf was illuminated at  $400 \mu\text{mol photons m}^{-2} \text{ s}^{-1}$  for 40 min, and  
452 then darkened for 20 min. The total amount of  $\text{CO}_2$  release during the PIB was estimated as the  
453 area of PIB peak determined from the trace of  $\text{CO}_2$  release in the dark period after the baseline

454 correction. The baseline was identified from the level of CO<sub>2</sub> release in the last 200 s of dark  
455 period.

### 456 **Metabolic response to transient increases in rubisco oxygenation**

457 Plants were treated with a rapid increase of light intensity from 50  $\mu\text{mol photons m}^{-2} \text{s}^{-1}$  to 400  
458  $\mu\text{mol photons m}^{-2} \text{s}^{-1}$ . Leaf tissues were collected before (time t=0) and after the shift to high  
459 light at the indicated time points. Samples were immediately frozen in liquid nitrogen and  
460 weighed before being stored at -80°C. Five biological replicates were performed for each  
461 genotype. The frozen samples were ground to a fine powder using a bead beating grinder with  
462 a sample holder containing dry ice. Metabolites were extracted with a solution of  
463 chloroform:methanol (3:7,v/v) and ribitol was used as internal standard. After centrifugation,  
464 the supernatant was freeze dried using a lyophilizer. Dried metabolites were methoximated (20  
465 mg/mL methoxyamine in pyridine) and trimethylsilylated (MSTFA: TMSCI, 99:1) and then  
466 analyzed by GC-MS (Agilent 5975, GC/single quadrupole MS). GC-MS data were processed by  
467 Agilent MSD ChemStation. Metabolite derivatives were identified by comparison of the  
468 retention time with a known standard and comparison of the mass spectra with MS database.  
469 The amount of each metabolite was quantified by the total ion current signal of each  
470 metabolite peak normalized to the ribitol internal standard and tissue weight.

### 471 **Measurements of folates and formate**

472 Formate was extracted by resuspending pulverized leaf tissue (~100 mg) in 0.25 ml of 0.1 M  
473 HCl, with 10  $\mu\text{l}$  of 10 mM amino butyric acid (ABA) added as an internal control. After  
474 centrifuging at 14,000 rpm for 20 min at 4 °C, the supernatant was collected, and the pellet was  
475 re-extracted with 0.25 ml of 0.1 M HCl. The supernatants were combined for analysis. Formate  
476 was analyzed using a published procedure (Xie et al. 2012) with some modifications. 50  $\mu\text{l}$  of  
477 each sample was combined with 50  $\mu\text{l}$  of Tetrabutylammonium bromide in Acetonitrile  
478 (20 $\mu\text{mole/mL}$ ), 50  $\mu\text{l}$  of Triethanolamine and 1  $\mu\text{l}$  of 9-chloromethyl anthracene as a  
479 fluorescence-labeling reagent. The reaction was added up to 500  $\mu\text{l}$  with acetonitrile and then  
480 was incubated at 75 °C for 50 min. After centrifuging at 14000 rpm for 10 min at 25 °C to



481 precipitate the debris, the samples were separated on the Xterra MS C<sub>18</sub> column (3.5 $\mu$ m, 4.6 x  
482 100 mm, Waters, MA) with mobile phase of 64% acetonitrile and 36% water at the 1.0 mL/min  
483 constant rate.

484 Folates were extracted and analyzed as previously described (Hung et al. 2012). There were five  
485 biological replicates performed for each line for formate and folate analysis.

## 486 **Measurement of hydrogen peroxide**

487 Hydrogen peroxide concentrations were measured in leaf tissues using a H<sub>2</sub>O<sub>2</sub> Assay Kit from  
488 Abcam (ab102500, Cambridge, UK). Leaf tissues were harvested and homogenized as described  
489 above for metabolic response study, except that the frozen leaf tissues were immediately used  
490 for homogenization without storing at -80°C. Three biological replicates were performed for  
491 each genotype. After extraction and centrifugation, samples were deproteinized with 4 M  
492 perchloric acid, and then neutralized with 2 M KCl until pH between 6.5 and 8.0. All standards  
493 and deproteinized samples were incubated with OxiRed probe and horseradish peroxidase for  
494 10 min at room temperature before measurements. Absorbance and fluorescence were  
495 measured with a 96-well plate reader (SpectraMax M2) at OD = 570 nm and  
496 Ex/Em = 535/587 nm.

## 497 **Lipid analysis**

498 Polar glycerolipids were analyzed as described (Wang and Benning 2011). The Lipids were  
499 extracted from fresh leaves tissues. Polar lipids were separated on a silica-gel thin-layer  
500 chromatography plate treated with (NH<sub>4</sub>)<sub>2</sub>SO<sub>4</sub> and a solvent system of acetone:toluene:water  
501 (91:30:7, v/v/v). Lipid spots were visualized with brief iodine vapor staining. Individual lipids,  
502 phosphatidylcholine (PC) and phosphatidylethanolamine (PE) were scraped off, and their fatty  
503 acid profiles were analyzed using gas-liquid Chromatography. Composition is presented as a  
504 mole percentage of total fatty methyl esters detected in each lipid. Three biological samples  
505 were collected for each line.

## 506 **Catalase activity**

507 Catalase enzyme kinetics were determined on raw tissue extracts using an oxygen electrode by  
508 following the increase in oxygen production at various  $[H_2O_2]$  in a 50 mM potassium phosphate  
509 buffer, pH 8.1 to match the pH of a plant peroxisome (Rørth and Jensen, 1967; Switala and  
510 Loewen, 2002; Shen et al., 2013). The oxygen electrode temperature was set to 25 °C via a  
511 recirculating water bath.

## 512 **Determining rate constants and order of non-enzymatic reactions**

513 The reaction between  $H_2O_2$  and either glyoxylate or hydroxypyruvate was measured using UV-  
514 spectroscopy at 240 nm in a quartz reaction cuvette at 25 °C (Yokota et al., 1985) in a 50 mM  
515 potassium phosphate buffer, pH 8.1 to match the pH of a plant peroxisome. Since both  
516 glyoxylate and hydroxypyruvate also absorb at 240 nm, the absorbance drop attributed only to  
517  $H_2O_2$  decay was corrected by also accounting for the extinction coefficients of either glyoxylate  
518 ( $14 \text{ l mol}^{-1} \text{ cm}^{-1}$ ) or hydroxypyruvate ( $188.9 \text{ l mol}^{-1} \text{ cm}^{-1}$ ).

## 519 **Acknowledgements**

520 We thank Marion Eisenhut for valuable discussions on photorespiration during the initial  
521 periods of planning this research. We additionally thank Ron Cook and Christoph Benning for  
522 help with the lipid analysis. We also thank Dr. Graham Noctor for providing the *cat2* seeds.

523 **Tables**

524 **Table I**

525

Table I: Metabolite content, catalase activity and protein content in *A. thaliana* wild type (WT) and plants lacking peroxisomal type catalase expression (*cat2*). Catalase activity was determined from leaf extracts by following the rate of oxygen production following H<sub>2</sub>O<sub>2</sub> addition in an O<sub>2</sub> electrode and presented both on a leaf area and mg protein basis. Protein content was determined on the same extract using a Bradford assay of soluble protein. Shown are the averages biological replicates (n=5 ± ster) determined with technical replicates (n=3) with significant differences (students t-test,  $\alpha < 0.05$ ) indicated by different letters.

|                                                                                | WT                     | <i>cat2</i>            |
|--------------------------------------------------------------------------------|------------------------|------------------------|
| Catalase activity (mol O <sub>2</sub> m <sup>-2</sup> s <sup>-1</sup> )        | 0.81±0.09 <sup>a</sup> | 0.18±0.02 <sup>b</sup> |
| Catalase activity (μmol O <sub>2</sub> mg <sup>-2</sup> Prot s <sup>-1</sup> ) | 1.94±0.18 <sup>a</sup> | 0.45±0.05 <sup>b</sup> |
| Protein content (mg m <sup>-2</sup> )                                          | 415±34 <sup>a</sup>    | 427±8 <sup>a</sup>     |

526

527

528

529

530

531

532

533

534

535

536



## Parsed Citations

- Abadie C, Boex-Fontvieille ERA, Carroll AJ, Tcherkez G (2016)** In vivo stoichiometry of photorespiratory metabolism. *Nat Plants* 2:15220  
Google Scholar: [Author Only](#) [Title Only](#) [Author and Title](#)
- Abadie C, Tcherkez G (2021)** <sup>13</sup>C Isotope Labelling to Follow the Flux of Photorespiratory Intermediates. *Plants* 10 (3):427  
Google Scholar: [Author Only](#) [Title Only](#) [Author and Title](#)
- Bauwe H, Hagemann M, Fernie AR (2010)** Photorespiration: players, partners and origin. *Trends Plant Sci* 15 (6):330-336.  
doi:<http://dx.doi.org/10.1016/j.tplants.2010.03.006>  
Google Scholar: [Author Only](#) [Title Only](#) [Author and Title](#)
- Bulley NR, Tregunna EB (1971)** Photorespiration and the postillumination CO<sub>2</sub> burst. *Can J Bot* 49 (8):1277-1284. doi:10.1139/b71-181  
Google Scholar: [Author Only](#) [Title Only](#) [Author and Title](#)
- Canvin DT, Berry JA, Badger MR, Fock H, Osmond CB (1980)** Oxygen exchange in leaves in the light. *Plant Phys* 66 (2):302-307.  
doi:10.1104/pp.66.2.302  
Google Scholar: [Author Only](#) [Title Only](#) [Author and Title](#)
- Cousins AB, Pracharoenwattana I, Zhou W, Smith SM, Badger MR (2008)** Peroxisomal malate dehydrogenase is not essential for photorespiration in *Arabidopsis* but its absence causes an increase in the stoichiometry of photorespiratory CO<sub>2</sub> release. *Plant Phys* 148 (2):786-795. doi:10.1104/pp.108.122622  
Google Scholar: [Author Only](#) [Title Only](#) [Author and Title](#)
- Cousins AB, Walker BJ, Pracharoenwattana I, Smith SM, Badger MR (2011)** Peroxisomal hydroxypyruvate reductase is not essential for photorespiration in *Arabidopsis* but its absence causes an increase in the stoichiometry of photorespiratory CO<sub>2</sub> release. *Photosynth Res* 108:91-100. doi:10.1007/s11120-011-9651-3  
Google Scholar: [Author Only](#) [Title Only](#) [Author and Title](#)
- Doehlert DC, Ku MSB, Edwards GE (1979)** Dependence of the post-illumination burst of CO<sub>2</sub> on temperature, light, CO<sub>2</sub>, and O<sub>2</sub> concentration in wheat (*Triticum aestivum*). *Physiol Plant* 46 (4):299-306. doi:10.1111/j.1399-3054.1979.tb02625.x  
Google Scholar: [Author Only](#) [Title Only](#) [Author and Title](#)
- Engelsberger WR, Schulze WX (2012)** Nitrate and ammonium lead to distinct global dynamic phosphorylation patterns when resupplied to nitrogen-starved *Arabidopsis* seedlings. *The Plant Journal* 69 (6):978-995. doi:doi:10.1111/j.1365-313X.2011.04848.x  
Google Scholar: [Author Only](#) [Title Only](#) [Author and Title](#)
- Farquhar GD, von Caemmerer S, Berry JA (1980)** A biochemical model of photosynthetic CO<sub>2</sub> assimilation in leaves of C<sub>3</sub> species. *Planta* 149 (1):78-90. doi:10.1007/bf00386231  
Google Scholar: [Author Only](#) [Title Only](#) [Author and Title](#)
- Foyer CH, Noctor G (2009)** Redox Regulation in Photosynthetic Organisms: Signaling, Acclimation, and Practical Implications. *Antioxidants & Redox Signaling* 11 (4):861-905. doi:doi:10.1089/ars.2008.2177  
Google Scholar: [Author Only](#) [Title Only](#) [Author and Title](#)
- Grodzinski B (1978)** Glyoxylate decarboxylation during photorespiration. *Planta* 144 (1):31-37  
Google Scholar: [Author Only](#) [Title Only](#) [Author and Title](#)
- Grodzinski B, Butt V (1977)** The effect of temperature on glycolate decarboxylation in leaf peroxisomes. *Planta* 133 (3):261-266  
Google Scholar: [Author Only](#) [Title Only](#) [Author and Title](#)
- Grodzinski B, Butt VS (1976)** Hydrogen peroxide production and the release of carbon dioxide during glycolate oxidation in leaf peroxisomes. *Planta* 128 (3):225-231. doi:10.1007/BF00393233  
Google Scholar: [Author Only](#) [Title Only](#) [Author and Title](#)
- Halliwell B, Butt VS (1974)** Oxidative decarboxylation of glycolate and glyoxylate by leaf peroxisomes. *Biochem J* 138 (2):217-224  
Google Scholar: [Author Only](#) [Title Only](#) [Author and Title](#)
- Hanson A, Roje S (2001)** One-Carbon Metabolism in Higher Plants. *Annu Rev of Plant Biol* 52 (1):119-137  
Google Scholar: [Author Only](#) [Title Only](#) [Author and Title](#)
- Hodges M, Jossier M, Boex-Fontvieille E, Tcherkez G (2013)** Protein phosphorylation and photorespiration. *Plant Biology* 15 (4):694-706. doi:doi:10.1111/j.1438-8677.2012.00719.x  
Google Scholar: [Author Only](#) [Title Only](#) [Author and Title](#)
- Hung C-Y, Fan L, Kittur FS, Sun K, Qiu J, Tang S, Holliday BM, Xiao B, Burkey KO, Bush LP, Conkling MA, Roje S, Xie J (2012)** Alteration of the Alkaloid Profile in Genetically Modified Tobacco Reveals a Role of Methylene-tetrahydrofolate Reductase in Nicotine N-Demethylation *Plant Phys* 161 (2):1049-1060. doi:10.1104/pp.112.209247  
Google Scholar: [Author Only](#) [Title Only](#) [Author and Title](#)
- Keech O, Zhou W, Fenske R, Colas-des-Francis-Small C, Bussell JD, Badger MR, Smith SM (2012)** The Genetic Dissection of a Short-Term Response to Low CO<sub>2</sub> Supports the Possibility for Peroxide-Mediated Decarboxylation of Photorespiratory Intermediates in the Peroxisome. *Molecular Plant* 5 (6):1413-1416. doi:10.1093/mp/sss104

Google Scholar: [Author Only](#) [Title Only](#) [Author and Title](#)

**Kok B (1948) A Critical consideration of the quantum yield of Chlorella-photosynthesis. Proefschrift ter verkrijging van de graad van doctor in de wis-en natuurkunde aan de Rijksuniversiteit te Utrecht... door Bessel Kok. W. Junk,**

Google Scholar: [Author Only](#) [Title Only](#) [Author and Title](#)

**Laisk A (1977) Kinetics of photosynthesis and photorespiration in C3 plants. Nauka, Moscow (in Russian):195**

Google Scholar: [Author Only](#) [Title Only](#) [Author and Title](#)

**Queval G, Hager J, Gakière B, Noctor G (2008) Why are literature data for H<sub>2</sub>O<sub>2</sub> contents so variable? A discussion of potential difficulties in the quantitative assay of leaf extracts. J Exp Bot 59 (2):135-146. doi:10.1093/jxb/erm193**

Google Scholar: [Author Only](#) [Title Only](#) [Author and Title](#)

**Queval G, Issakidis-Bourguet E, Hoeberichts FA, Vandorpe M, Gakière B, Vanacker H, Miginiac-Maslow M, Van Breusegem F, Noctor G (2007) Conditional oxidative stress responses in the Arabidopsis photorespiratory mutant cat2 demonstrate that redox state is a key modulator of daylength-dependent gene expression, and define photoperiod as a crucial factor in the regulation of H<sub>2</sub>O<sub>2</sub>-induced cell death. The Plant Journal 52 (4):640-657. doi:10.1111/j.1365-313X.2007.03263.x**

Google Scholar: [Author Only](#) [Title Only](#) [Author and Title](#)

**Schindelin J, Arganda-Carreras I, Frise E, Kaynig V, Longair M, Pietzsch T, Preibisch S, Rueden C, Saalfeld S, Schmid BJNm (2012) Fiji: an open-source platform for biological-image analysis. 9 (7):676**

Google Scholar: [Author Only](#) [Title Only](#) [Author and Title](#)

**Schneider CA, Rasband WS, Eliceiri KW (2012) NIH Image to ImageJ: 25 years of image analysis. Nature Methods 9:671. doi:10.1038/nmeth.2089**

Google Scholar: [Author Only](#) [Title Only](#) [Author and Title](#)

**Sharkey TD (1988) Estimating the rate of photorespiration in leaves. Physiol Plant 73 (1):147-152. doi:10.1111/j.1399-3054.1988.tb09205.x**

Google Scholar: [Author Only](#) [Title Only](#) [Author and Title](#)

**Sharkey TD, Weise SE (2016) The glucose 6-phosphate shunt around the Calvin-Benson cycle. J Exp Bot 67 (14):4067-4077. doi:10.1093/jxb/erv484**

Google Scholar: [Author Only](#) [Title Only](#) [Author and Title](#)

**Somerville CR (2001) An Early Arabidopsis Demonstration. Resolving a Few Issues Concerning Photorespiration. Plant Phys 125 (1):20-24. doi:10.1104/pp.125.1.20**

Google Scholar: [Author Only](#) [Title Only](#) [Author and Title](#)

**Somerville CR, Ogren WL (1980) Photorespiration mutants of Arabidopsis thaliana deficient in serine-glyoxylate aminotransferase activity. Proceedings of the National Academy of Sciences 77 (5):2684-2687**

Google Scholar: [Author Only](#) [Title Only](#) [Author and Title](#)

**South PF, Cavanagh AP, Liu HW, Ort DR (2019) Synthetic glycolate metabolism pathways stimulate crop growth and productivity in the field. Science 363 (45). doi:10.1126/science.aat9077 %J Science**

Google Scholar: [Author Only](#) [Title Only](#) [Author and Title](#)

**Sun Y, Gu L, Dickinson RE, Norby RJ, Pallardy SG, Hoffman FM (2014) Impact of mesophyll diffusion on estimated global land CO<sub>2</sub> fertilization. Proceedings of the National Academy of Sciences 111 (44):15774-15779. doi:10.1073/pnas.1418075111**

Google Scholar: [Author Only](#) [Title Only](#) [Author and Title](#)

**Timm S, Florian A, Arrivault S, Stitt M, Fernie AR, Bauwe H (2012) Glycine decarboxylase controls photosynthesis and plant growth. FEBS Lett 586 (20):3692-3697. doi:10.1016/j.febslet.2012.08.027**

Google Scholar: [Author Only](#) [Title Only](#) [Author and Title](#)

**Timm S, Nunes-Nesi A, Parnik T, Morgenthal K, Wenkoop S, Keerberg O, Weckwerth W, Kleczkowski LA, Fernie AR, Bauwe H (2008) A cytosolic pathway for the conversion of hydroxypyruvate to glycerate during photorespiration in Arabidopsis. Plant Cell 20 (10):2848-2859. doi:10.1105/tpc.108.062265**

Google Scholar: [Author Only](#) [Title Only](#) [Author and Title](#)

**von Caemmerer S (2013) Steady-state models of photosynthesis. Plant Cell Environ 36 (9):1617-1630. doi:10.1111/pce.12098**

Google Scholar: [Author Only](#) [Title Only](#) [Author and Title](#)

**von Caemmerer S, Farquhar GD (1981) Some relationships between the biochemistry of photosynthesis and the gas exchange of leaves. Planta 153 (4):376-387**

Google Scholar: [Author Only](#) [Title Only](#) [Author and Title](#)

**Walker BJ, Ariza LS, Kaines S, Badger MR, Cousins AB (2013) Temperature response of in vivo Rubisco kinetics and mesophyll conductance in Arabidopsis thaliana: comparisons to Nicotiana tabacum. Plant Cell Environ 36 (12):2108-2119. doi:10.1111/pce.12166**

Google Scholar: [Author Only](#) [Title Only](#) [Author and Title](#)

**Walker BJ, Cousins A (2013) Influence of temperature on measurements of the CO<sub>2</sub> compensation point: differences between the Laisk and O<sub>2</sub>-exchange methods. J Exp Bot 64 (7):1893-1905. doi:10.1093/jxb/ert058**

Google Scholar: [Author Only](#) [Title Only](#) [Author and Title](#)

**Walker BJ, Ort DR (2015) Improved method for measuring the apparent CO<sub>2</sub> photocompensation point resolves the impact of multiple internal conductances to CO<sub>2</sub> to net gas exchange. Plant Cell Environ 38 (11):2462-2474. doi:10.1111/pce.12562**

Google Scholar: [Author Only](#) [Title Only](#) [Author and Title](#)

**Walker BJ, Skabelund DC, Busch FA, Ort DR (2016a) An improved approach for measuring the impact of multiple CO<sub>2</sub> conductances on the apparent photorespiratory CO<sub>2</sub> compensation point through slope-intercept regression. Plant Cell Environ 39 (6):1198-1203. doi:10.1111/pce.12722**

Google Scholar: [Author Only](#) [Title Only](#) [Author and Title](#)

**Walker BJ, Strand DD, Kramer DM, Cousins AB (2014) The response of cyclic electron flow around photosystem I to changes in photorespiration and nitrate assimilation. Plant Phys 165 (1):453-462. doi:10.1104/pp.114.238238**

Google Scholar: [Author Only](#) [Title Only](#) [Author and Title](#)

**Walker BJ, VanLoocke A, Bernacchi CJ, Ort DR (2016b) The costs of photorespiration to food production now and in the future. Annu Rev of Plant Biol 67 (1):107-129. doi:10.1146/annurev-arplant-043015-111709**

Google Scholar: [Author Only](#) [Title Only](#) [Author and Title](#)

**Wang Z, Benning C (2011) Arabidopsis thaliana polar glycerolipid profiling by thin layer chromatography (TLC) coupled with gas-liquid chromatography (GLC). Journal of visualized experiments : JoVE (49). doi:10.3791/2518**

Google Scholar: [Author Only](#) [Title Only](#) [Author and Title](#)

**Xie Z, Yu L, Yu H, Deng Q (2012) Application of a Fluorescent Derivatization Reagent 9-Chloromethyl Anthracene on Determination of Carboxylic Acids by HPLC. J Chromatogr Sci 50 (6):464-468. doi:10.1093/chromsci/bms023**

Google Scholar: [Author Only](#) [Title Only](#) [Author and Title](#)

**Xu Y, Fu X, Sharkey TD, Shachar-Hill Y, Walker BJ (2021) The metabolic origins of non-photorespiratory CO<sub>2</sub> release during photosynthesis: A metabolic flux analysis. Plant Phys. doi:10.1093/plphys/kiab076**

Google Scholar: [Author Only](#) [Title Only](#) [Author and Title](#)
